# Supplementary material for: Socio-economic and Healthcare Determinants of Health Insurance Awareness and Enrollment in Ilorin, Nigeria
Source: Research Square preprint supplement (doi:10.21203/rs.3.rs-7754583/v1), 2025-11-10
Supplement: Supplementary file 1 [file 0e76233298ba8533323cc48e.docx]

**RESEARCH QUESTIONNAIRE Date: _____________**

We are a team of healthcare professionals carrying out a research on **Socio-economic and Healthcare Determinants of Health Insurance Awareness and Enrollment in Ilorin, Nigeria**. We will require you to provide us with very accurate information in the questions below.

**SECTION A: SOCIO DEMOGRAPHIC DATA**

1. Age (Year): 18 - 27 [ ] 28 - 37 [ ] 38 - 47 [ ] 48 - 57 [ ] 58 - 70 [ ]
2. Gender: Male [ ] Female [ ] Other [ ]

3. Place of Residence: Ilorin [ ] Others [ ]................................(Specify)

4. How many years have you reside in Ilorin _______________ (Specify)

4. Religion: Islam [ ] Christianity [ ] Other [ ]........................... (Specify)

5. Marital Status: Single [ ] Married [ ] Others [ ] ______________ (Specify)

6. Occupation: Student [ ] Private Worker [ ] Unemployed [ ] Government worker [ ] Self Employed [ ] Retired [ ]

7. Are you a healthcare worker?: Yes [ ] No [ ]

8. Educational Level: No Formal Education [ ] Primary [ ] Secondary [ ] Tertiary [ ] Postgraduate [ ]

**SECTION B: KNOWLEDGE OF UNIVERSAL HEALTH COVERAGE**

1. How will you rate the quality of healthcare in Ilorin? Excellent [ ] Good [ ] Fair [ ] Poor [ ]

2. How will you rate your knowledge about Universal Health Coverage? Well Informed [ ] Informed [ ] Not Informed [ ]

**Universal Health Coverage means that everyone, irrespective of their ability to pay, gets the health services they need without suffering undue financial hardship in the process**.

3. With the definition provided above, what do you think is the objective of Universal Health Coverage? Healthcare Equity Access [ ] Quality Healthcare [ ] Financial-Risk Protection [ ]

Others...............................................(please specify)

4. With the definition provided above, how important do you think Universal Health Coverage is? Very Important [ ] Somewhat Important [ ] Not Very Important [ ] Not At All Important [ ]

5. Do you believe healthcare is a fundamental human right? Yes[ ] No [ ] Undecided [ ]

**SECTION C: AWARENESS, ENROLLMENT AND BARRIERS TO HEALTH INSURANCE**

1. Have you or a family member experienced any financial hardship due to medical expenses?

Yes [ ] No [ ]

2. How confident are you in your ability to afford healthcare services if you need them?

Very Confident [ ] Somewhat Confident [ ] Not Very Confident [ ] Not At All Confident [ ]

3. How will you rate your knowledge about health insurance? Full Understanding [ ] Basic Understanding [ ] Zero Understanding [ ]

4. Are you aware of any health insurance scheme available in Ilorin? Yes [ ] No [ ]

5. How did you learn about health insurance scheme? Healthcare Provider [ ] Family/Friends [ ] Government Website [ ] NGOs Website [ ] Social Media [ ] Television/Radio Stations [ ] Newspaper [ ]

6. Do you currently have health insurance? Yes [ ] No [ ]

7. If **YES**, what type of health insurance you have? National Health Insurance Scheme [ ] State Health Insurance Scheme [ ] Community-Based Health Insurance Scheme [ ] Private Hospital Health Insurance Scheme [ ]

8. How often do you use your health insurance? Regularly [ ] Occasionally [ ] Rarely [ ] Never [ ]

9. What services have you used your health insurance for? (Select all that apply) [ ] Doctor visits [ ] Hospital Stays/Admission [ ] Prescription Medication [ ] Preventive Care ( e.g, check up, screening) [ ] Others (please specify)........................

10. How satisfied are you with your current health insurance coverage? Very satisfied [ ] Somewhat satisfied [ ] Neutral [ ] Somewhat dissatisfied [ ] Very dissatisfied [ ]

11. What difficulties, if any, do you face in accessing your health insurance coverage? (Select all that apply) [ ] Cost [ ] Limited coverage for certain conditions or treatment [ ] Distance to healthcare facilities [ ] Long wait times for appointments [ ] Healthcare providers behavior

[ ] Difficulty in enrolling or renewing coverage [ ] Lack of transparency in coverage [ ] Limited access to specialist or primary care physician [ ] Others (please specify)...........................

12. What factors, if any, have influenced your decision to not have health insurance coverage? (Select all that apply) [ ] Cost [ ] Lack of awareness of available plans [ ] Difficulty in enrolling [ ] Lact of transparency in coverage and cost [ ] Cultural or religion beliefs [ ] Other (please specify): _________________
